# Supplementary material for: Accelerated fabrication of antibacterial and osteoinductive electrospun fibrous scaffolds via electrochemical deposition
Source: Royal Society of Chemistry journal article supplement (doi:10.1039/c8ra01011k), 2018-01-01
Supplement: c8ra01011k1.pdf [file c8ra01011k1.pdf]

1

2

## Supplementary Information

3

4 **Accelerate Fabrication of Antibacterial and Osteoinductive Electrospun**

5 **Fibrous Scaffolds via Electrochemical Deposition**

6 Yingbo Wang,<sup>a1\*</sup> Ya Gao,<sup>a1</sup> Guoqiang Xu,<sup>b1</sup> Han Liu,<sup>c</sup> Yi Xiang,<sup>c</sup> Wenguo Cui,<sup>c\*</sup>

7 <sup>a</sup> College of Chemical Engineering, Xinjiang Normal University, 102 Xinyi Road, Urumqi 830054,

8 China

9 <sup>b</sup> Department of Prosthodontics, the First Affiliated Hospital of Xinjiang Medical University, 393 Xinyi

10 Road, Urumqi 830054, China

11 <sup>c</sup> Shanghai Institute of Traumatology and Orthopaedics, Shanghai Key Laboratory for Prevention and

12 Treatment of Bone and Joint Diseases, Ruijin Hospital, Shanghai Jiao Tong University School of

13 Medicine, 197 Ruijin 2nd Road, Shanghai 200025, P. R. China

14

15 1 These authors contributed equally.

16 **Corresponding Author**

17 \*Yingbo Wang, E-mail: ybwang20002575@163.com; Tel. (Fax): (+86) 09914333279.

18 \*Wenguo Cui, E-mail: wgcui80@hotmail.com; Tel. (Fax): (+86) 21-64370045\*663332.

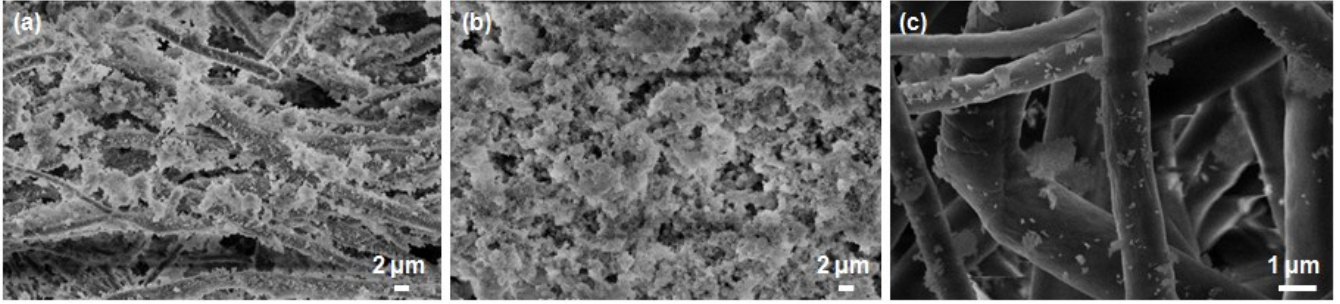

1  
2 **Fig. S1** SEM micrographs of calcium phosphate deposited on fiber surface in ED electrolyte of different  
3  $\text{Ca}^{2+}$  concentration: (a) 42 mmol/L; (b) 16.7 mmol/L; (c) 5 mmol/L.

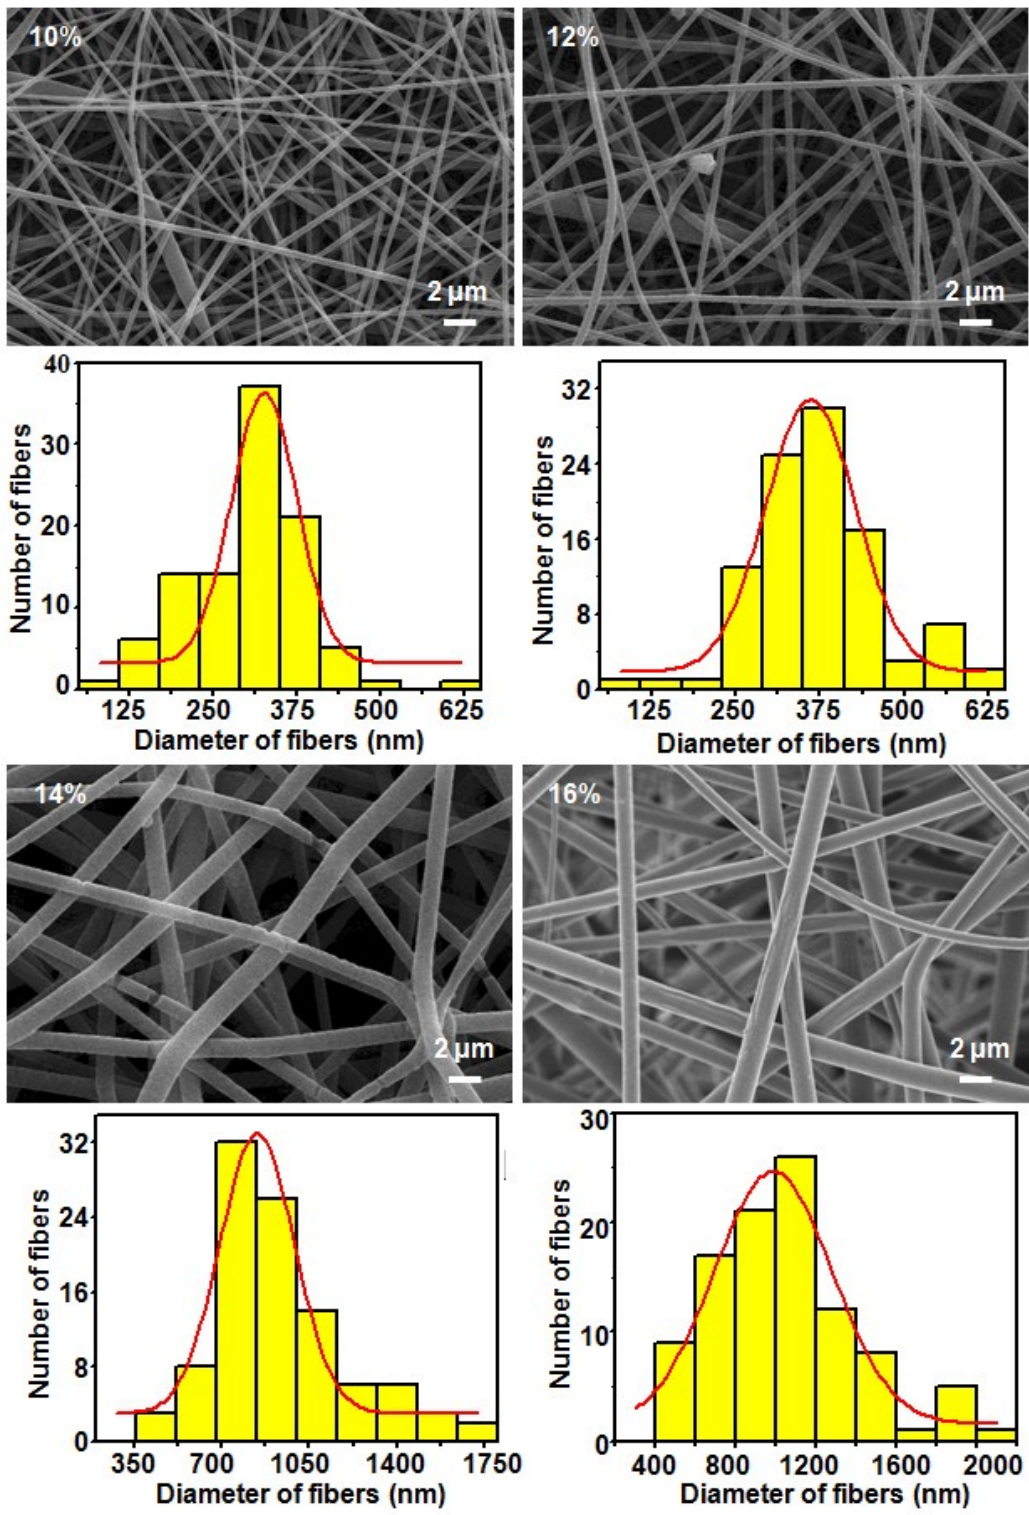

1  
2 **Fig. S2** SEM and diameter profiles of PLLA fabricated at different concentrations.

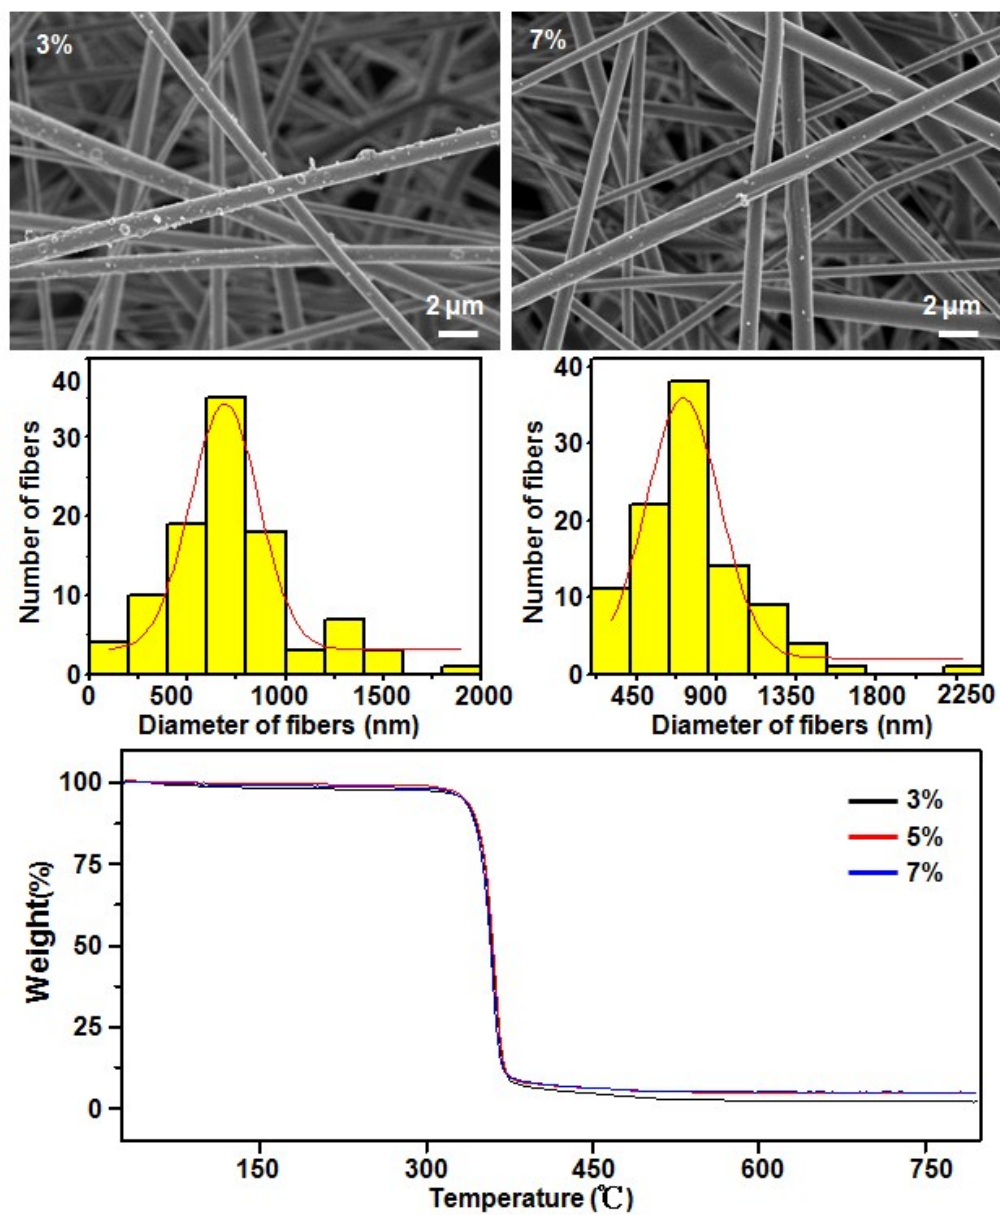

1  
2  
3

**Fig. S3** The morphology, diameter distribution and TG graph of fibers with various nano-Ag concentrations.

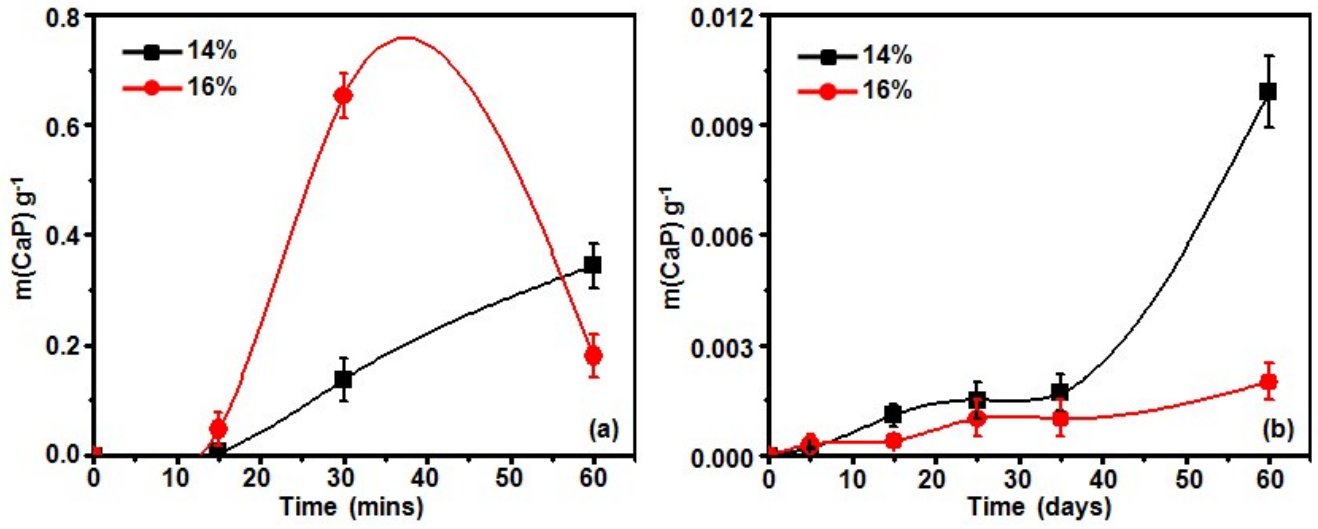

Fig. S4 The content of calcium phosphate content on the surface of PLLA fiber with PLLA concentration 14% and 16% in process of (a) ED; (b) SCPS.

1  
2  
3  
4

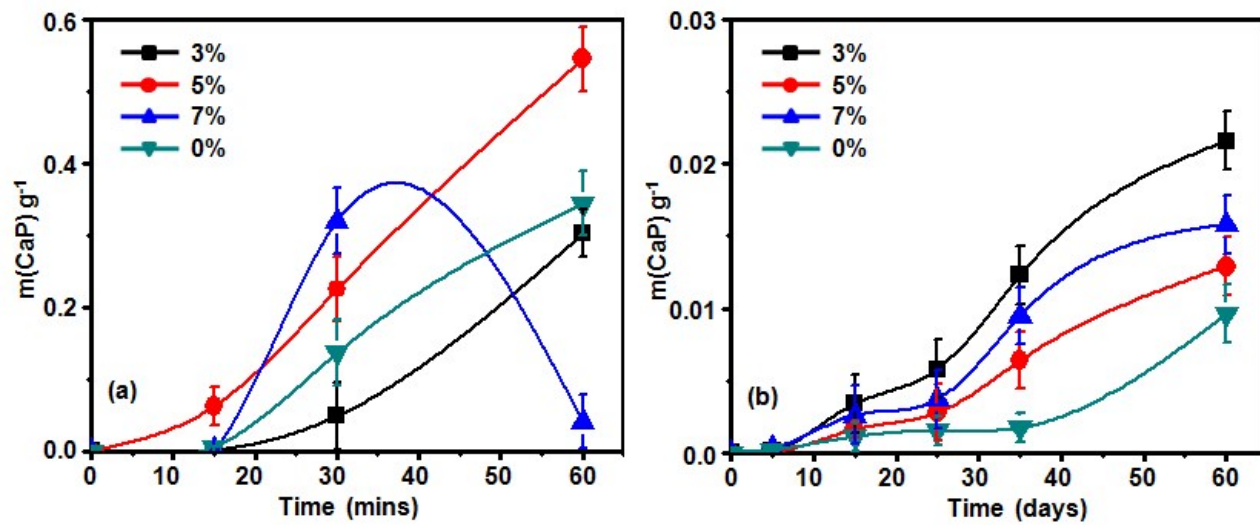

1  
 2 **Fig. S5** The content of calcium phosphate content on the surface of PLLA fiber with 0, 3, 5 and 7 %  
 3 nano-Ag in process of (a) ED; (b) SCPS.  
 4  
 5

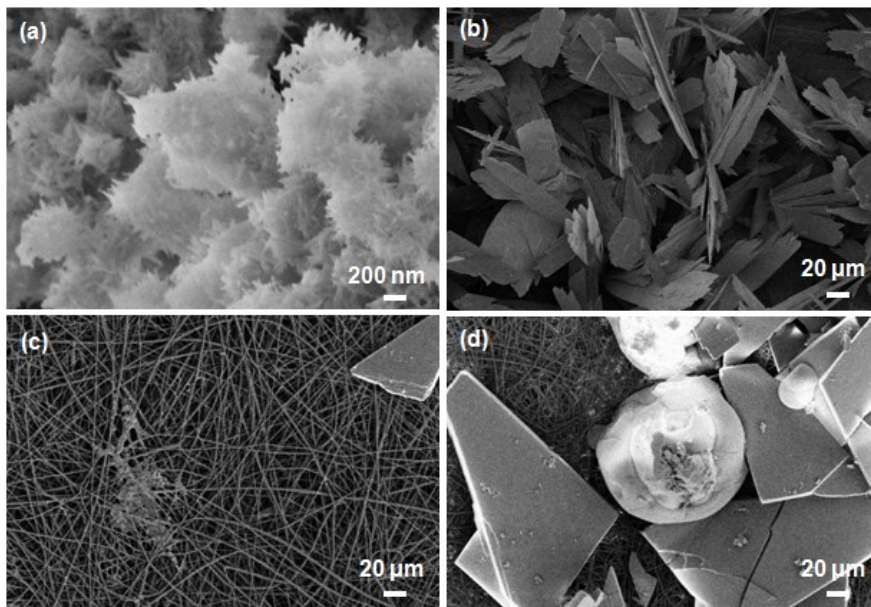

1  
2 **Fig. S6** SEM of mineralized composite fibers: (a) PLLA, ED; (b) PLLA/Ag, ED; (c) PLLA, SCPS; (d)  
3 PLLA/Ag, SCPS.  
4

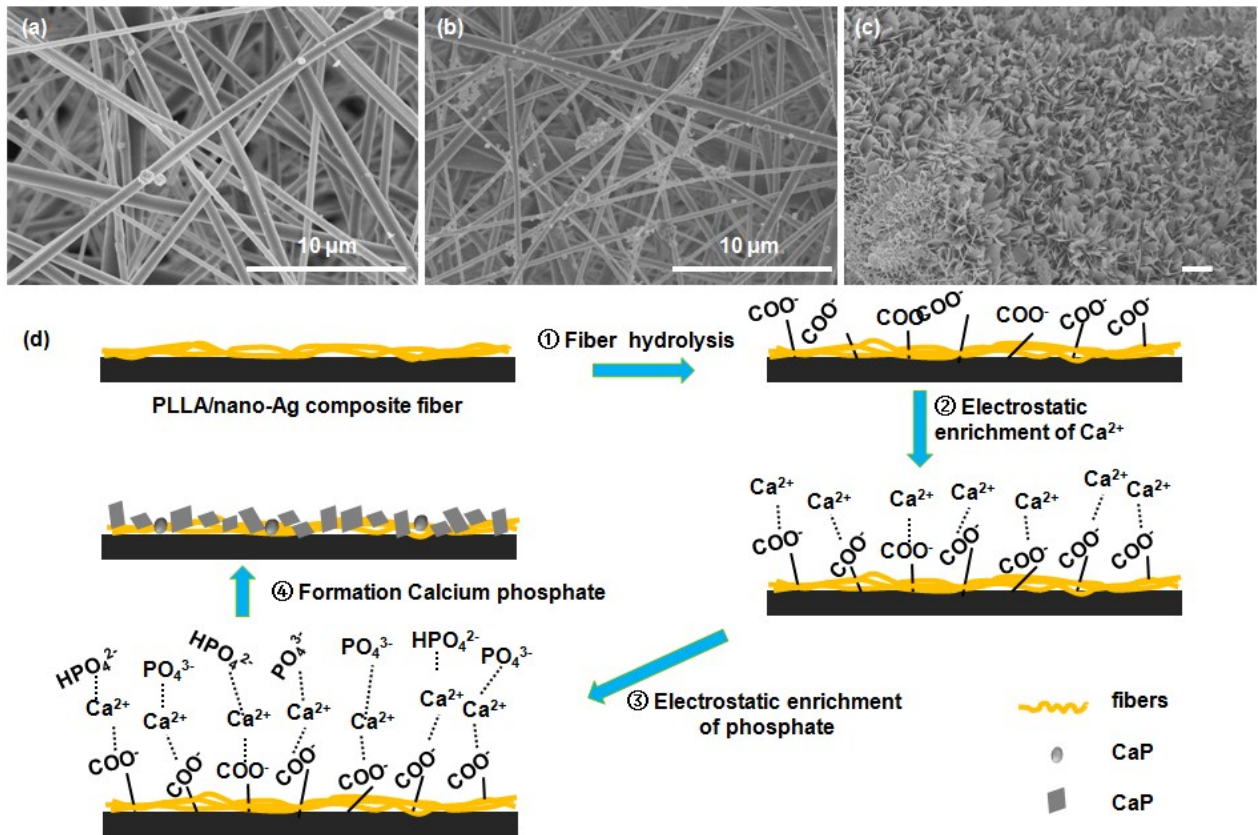

1  
2 **Fig. S7** SEM of composite fiber with different deposition time. (a) 3 d; (b) 7 d; (c) 12 d; (d) deposition  
3 mechanism.

4  
5



1  
2  
3

**Table S1. Ion concentrations of SCPS.**

| Ions                                      | Na <sup>+</sup> | Ca <sup>2+</sup> | Cl <sup>-</sup> | HPO <sub>4</sub> <sup>2-</sup> |
|-------------------------------------------|-----------------|------------------|-----------------|--------------------------------|
| concentrations<br>(mmol·L <sup>-1</sup> ) | 142.0           | 12.5             | 217.0           | 5.0                            |

4  
5  
6  
7  
8  
9  
10  
11

**Table S2. The working parameters of AAS.**

| Element | Wave length<br>(nm) | Bandwidth spectrum<br>(nm) | Lamp electric current<br>(mA) | Air pressure<br>(MPa) | Ethyne of flux<br>(L·min <sup>-1</sup> ) |
|---------|---------------------|----------------------------|-------------------------------|-----------------------|------------------------------------------|
| Ca      | 422.7               | 0.5                        | 5                             | 0.2                   | 1.2                                      |
| Ag      | 328.1               | 1.3                        | 9                             | 0.16                  | 15                                       |

12
